# Supplementary material for: Impact of Parental Mental Health and Help-Seeking on Adolescents’ Suicidal Ideations and Help-Seeking Behaviors
Source: MDPI journal article supplement (doi:10.3390/ijerph20156538), 2023-08-07
Supplement: s1 [file s1]

**Table S1.** Comparison of Adolescent Mental Health between SI Group and Matched Control

|                        |   | Suicidal Ideation |            |       | Matched control |            |       | OR     | 95% CI |        |
|------------------------|---|-------------------|------------|-------|-----------------|------------|-------|--------|--------|--------|
|                        |   | N                 | Weighted N | %     | N               | Weighted N | %     |        | lower  | higher |
| <b>ADHD</b>            | N | 422               | 258176     | 98.70 | 415             | 240148     | 98.80 | 1.137  | 0.309  | 4.186  |
|                        | Y | 6                 | 3469       | 1.30  | 5               | 2838       | 1.20  |        |        |        |
| <b>Depressive Mood</b> | N | 255               | 154353     | 59.00 | 385             | 220670     | 90.70 | 6.759* | 4.315  | 10.586 |
|                        | Y | 173               | 107291     | 41.00 | 35              | 22695      | 9.30  |        |        |        |
| <b>Alcohol Use</b>     | N | 272               | 154134     | 74.30 | 283             | 163713     | 76.00 | 1.094  | 0.725  | 1.652  |
|                        | Y | 82                | 53259      | 25.70 | 86              | 51711      | 24.00 |        |        |        |
| <b>Smoking</b>         | N | 352               | 206592     | 85.20 | 387             | 221686     | 95.30 | 3.501* | 1.859  | 6.593  |
|                        | Y | 49                | 35907      | 14.80 | 18              | 11006      | 4.70  |        |        |        |
| <b>Help-Seeking</b>    | N | 331               | 197977     | 80.90 | 340             | 195945     | 95.30 | 4.847* | 2.547  | 9.222  |
|                        | Y | 69                | 46872      | 19.10 | 16              | 957        | 4.70  |        |        |        |

Note. ADHD; attention-deficit hyperactivity disorder \*Statistically significant results ( $p < 0.05$ ). Odds ratio (OR) and 95% confidence intervals (CI) are reported.

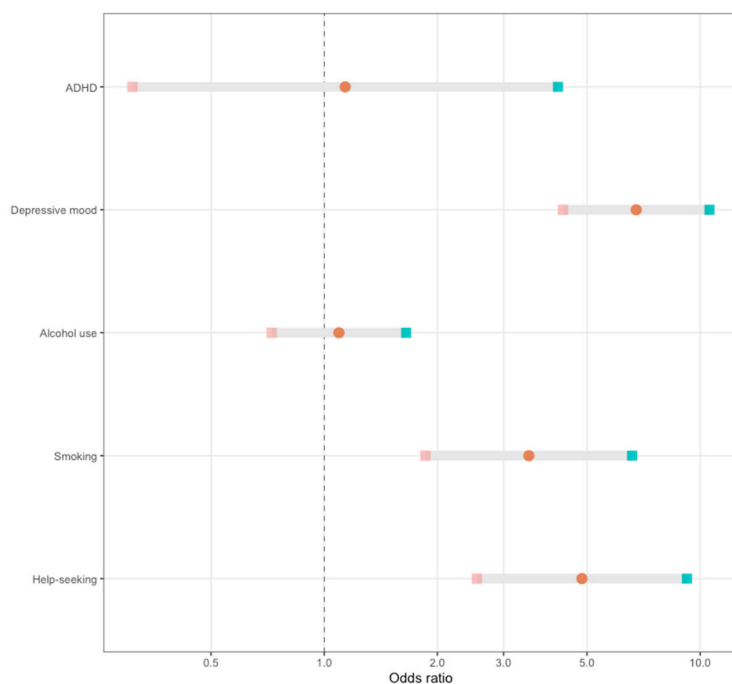**Figure S1.** Comparison of Adolescent Mental Health between SI Group and Matched Control. Odds ratio (OR) and 95% confidence intervals (CI) are reported.

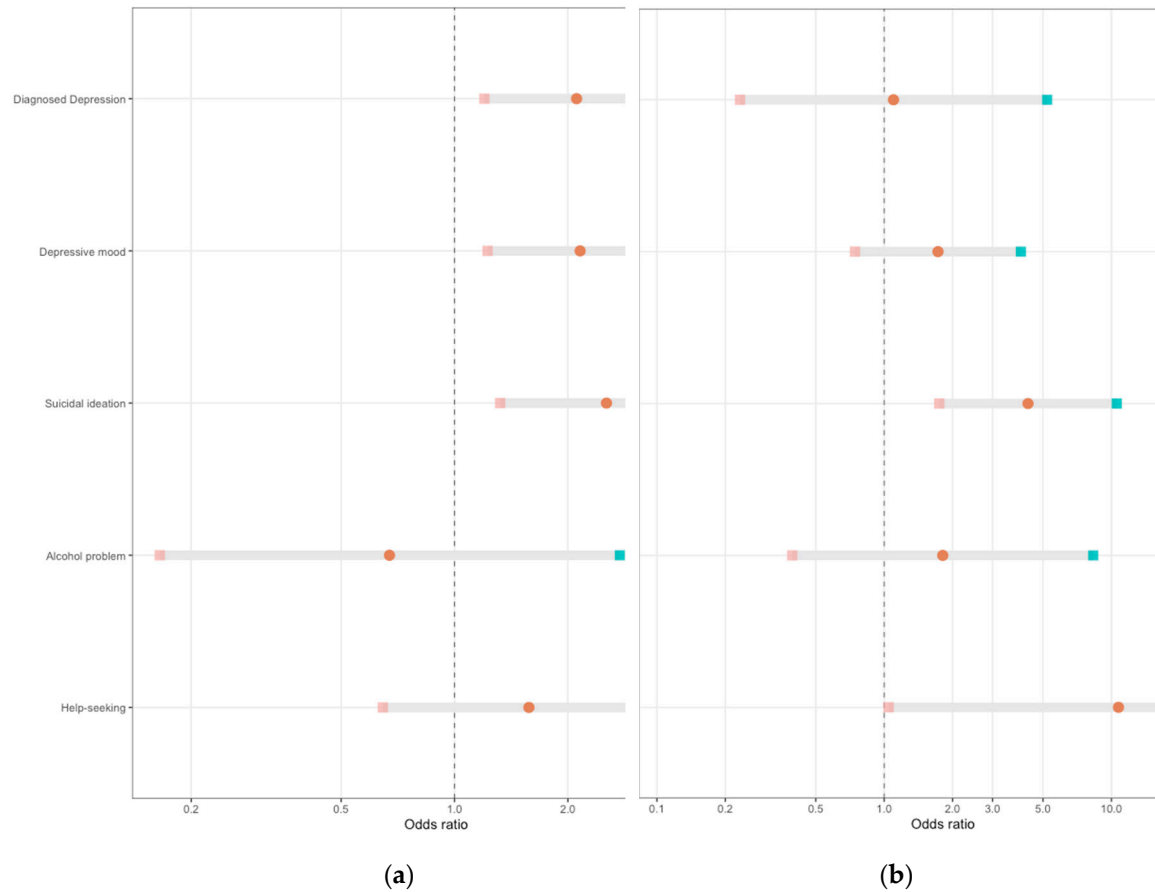

**Figure S2. (a)** Comparison of Maternal Mental Health between SI Group and Matched Control group; **(b)** Comparison of Maternal Paternal Health between SI Group and Matched Control group. Odds ratio (OR) and 95% confidence intervals (CI) are reported.

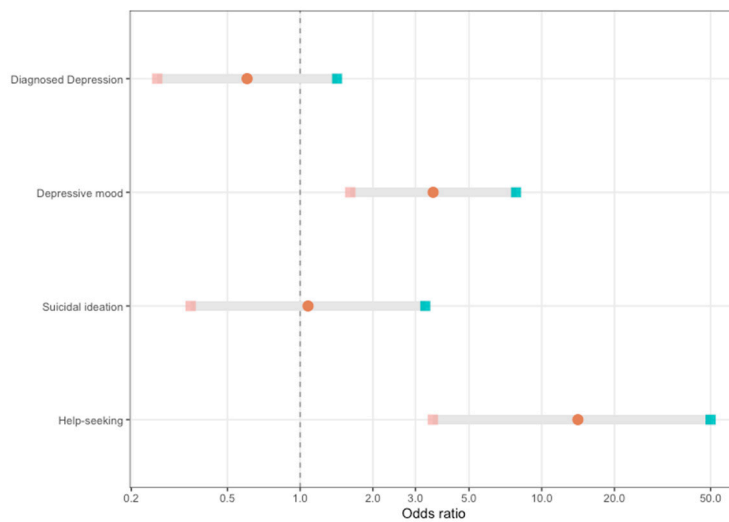

**Figure S3** Logistic Regression Analysis after adjusting Demographic Variables (Model 2). Odds ratio (OR) and 95% confidence intervals (CI) are reported.

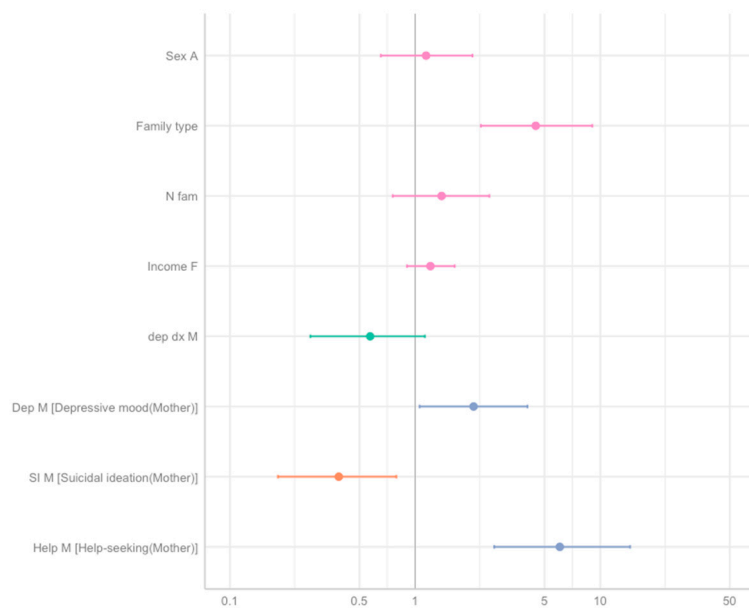

**Figure S4** Multivariate Logistic Regression Analysis according to Help-Seeking Behavior in SI group (Model 3). Odds ratio (OR) and 95% confidence intervals (CI) are reported.

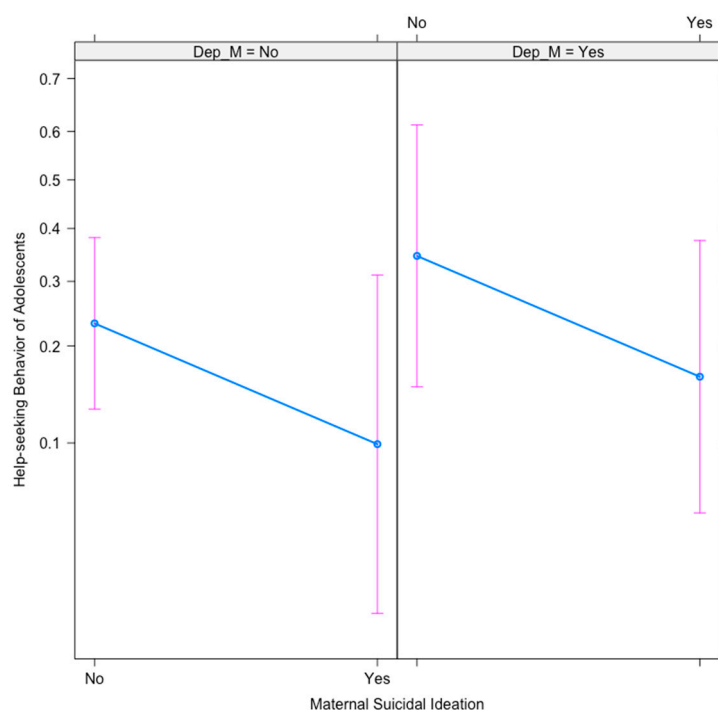

**Figure S5** The Interaction Impact of Maternal Suicidal Ideation on Help-Seeking in Adolescent with Suicidal Ideation.

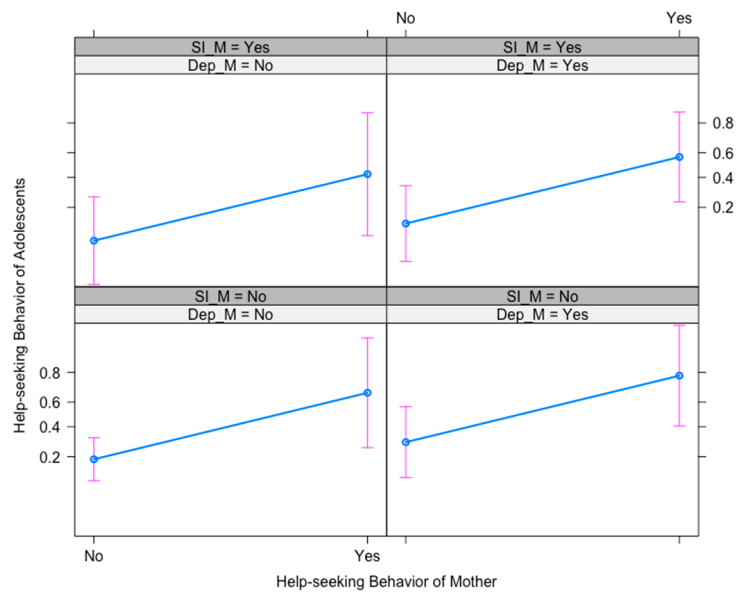

**Figure S6** The Impact of Maternal Help-Seeking Behavior on Adolescents'
